## STUDY PROTOCOL

# Efficacy of acupuncture in treating chemotherapy-related cognitive impairment in breast cancer patients: A systematic review and meta-analysis protocol

Lishi Liu , Zihan Meng, Jun Yan \*

The Second Department of Oncology, The First Affiliated Hospital of Heilongjiang University of Chinese Medicine, Harbin, China

\* [yanjuntcm@qq.com](mailto:yanjuntcm@qq.com)

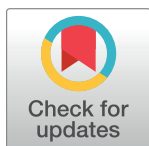

## Abstract

### Background

Chemotherapy-related cognitive impairment (CRCI) is a common adverse effect of chemotherapy in breast cancer patients, with a high incidence that significantly impacts treatment adherence and quality of life. Currently, there is no definitive and effective treatment for CRCI. Research indicates that acupuncture may serve as a promising intervention for CRCI. This study aims to assess the effectiveness of acupuncture in treating CRCI.

### Methods

This study is guided by the Preferred Reporting Items for Systematic Reviews and Meta-Analysis Protocols (PRISMA-P). From the time of database construction to October 2024, we will search seven literature databases, three clinical study registry databases, and three sources of gray literature. The restricted languages are English and Chinese. We will use the Participants-Interventions-Comparators-Outcome-Conclusion-Study Design (PICOS) criteria to identify included studies and the RoB2 tool to assess the quality of the included studies. Data synthesis and meta-analysis will be performed using RevMan 5.3.

### Discussion

The results of this study will clarify the potential benefits of acupuncture in the treatment of CRCI and address existing disagreements about its efficacy. Furthermore, the findings will assist clinicians in making informed decisions regarding the treatment of CRCI.

### Trail registration

PROSPERO registration number: [CRD42024568093](https://doi.org/10.1186/1745-6215-10-103).

## OPEN ACCESS

**Citation:** Liu L, Meng Z, Yan J (2025) Efficacy of acupuncture in treating chemotherapy-related cognitive impairment in breast cancer patients: A systematic review and meta-analysis protocol. PLoS ONE 20(2): e0318984. <https://doi.org/10.1371/journal.pone.0318984>

**Editor:** Yung-Hsiang Chen, China Medical University, TAIWAN

**Received:** September 30, 2024

**Accepted:** January 23, 2025

**Published:** February 6, 2025

**Copyright:** © 2025 Liu et al. This is an open access article distributed under the terms of the [Creative Commons Attribution License](https://creativecommons.org/licenses/by/4.0/), which permits unrestricted use, distribution, and reproduction in any medium, provided the original author and source are credited.

**Data Availability Statement:** No datasets were generated or analysed during the current study. All relevant data from this study will be made available upon study completion.

**Funding:** The author(s) received no specific funding for this work.

**Competing interests:** The authors have declared that no competing interests exist.

## 1. Introduction

Breast cancer is the most common type of malignant tumor in women, and its incidence is increasing year by year, with a rising trend in younger patients [1]. According to the International Agency for Research on Cancer (IARC), there were 2.3 million new cases of breast cancer in 2022, with an incidence rate of 11.6%, making it the second most prevalent cancer globally [2]. In recent years, the use of various treatments such as surgery, chemotherapy, radiation, targeted therapy, and endocrine therapy has significantly reduced the risk of breast cancer recurrence [3–5], leading to an average 5-year survival rate of 91% among patients [1].

Chemotherapy, a frequently employed and critical treatment option, however, often causes multiple adverse effects. Beyond common side effects like nausea, vomiting, and fatigue, chemotherapy can also lead to chemotherapy-related cognitive impairment (CRCI) [6], colloquially termed "chemobrain" or "chemofog." A systematic review has demonstrated a strong correlation between chemotherapy and cognitive impairment [7].

The primary symptoms of CRCI include memory loss, difficulty concentrating, slower processing speed, and impaired executive functioning [8]. The incidence of CRCI varies widely, ranging from 17% to 70% [9–11], and can be as high as 75% in breast cancer patients [12]. Additionally, 35% of breast cancer patients experience persistent cognitive dysfunction even 3 to 4 years after chemotherapy [13, 14]. Although the severity of CRCI is generally milder than the cognitive impairments typically seen in patients with common neurological disorders [15], it still negatively affects treatment adherence, increases disease burden, and significantly impacts the quality of life for breast cancer patients, leading to considerable financial, emotional, and interpersonal costs [16–18].

The pathophysiology of CRCI is not well understood but can be broadly categorized into the direct neurotoxic effects and the indirect consequences of chemotherapeutic drugs. Chemotherapy can impair brain metabolism and cellular function through direct cytotoxic damage to neuronal cells. It may also induce CRCI via indirect mechanisms, such as treatment-induced cytokine disorders, oxidative stress, genetic polymorphisms, and hormone level changes triggered by treatment [19].

Current treatments for CRCI are limited and can be broadly categorized into pharmaceutical and nonpharmaceutical approaches [20, 21]. Pharmaceutical therapies include antidementia drugs (e.g., donepezil, memantine, and ginkgo biloba), central nervous system stimulants (e.g., methylphenidate and modafinil), and erythropoietin. However, the efficacy of these medications remains uncertain and may even cause undesirable side effects [22–24]. Therefore, large-scale studies are needed to clarify their therapeutic effects and mechanisms. Nonpharmacological interventions, such as cognitive training [25], psychological interventions [26], and exercise therapy [27], are now widely recommended, with pharmaceutical treatments typically considered only when other approaches fail [21]. A systematic review of 13 studies that evaluated three pharmaceutical interventions (CNS stimulants, erythropoietin alpha, and ginkgo biloba) and two nonpharmaceutical interventions (cognitive training and physical activity) found that pharmacologic treatments were ineffective, whereas cognitive training and physical activity improved CRCI [28].

Acupuncture is a crucial therapeutic tool in traditional Chinese medicine (TCM), whereby the insertion of needles into specific regions of the body (acupoints) and vibrations, electrical currents, or other forms of stimulation are administered to achieve therapeutic aims [29]. It is used to treat a variety of diseases and discomforts, including pain [30], insomnia [31], anxiety [32], and depression [33]. In a network meta-analysis of nonpharmacologic therapies for CRCI, acupuncture ranked third among all interventions; however, its inclusion in the literature was early, and only two studies were included [34]. In contrast, acupuncture did not

achieve the anticipated impact in a systematic review. Multiple randomized controlled trials (RCTs) have demonstrated that acupuncture therapy enhances the management of CRCI in breast cancer patients [35–39], potentially attributed to an increase in brain-derived neurotrophic factor (BDNF) [39–42]. Further RCTs are presently being conducted to investigate the efficacy of acupuncture for treating CRCI in breast cancer [43]. Most RCTs have utilized the Montreal Cognitive Assessment (MoCA), the Mini-Mental State Examination (MMSE), and the Functional Assessment of Cancer Therapy-Cognitive Function (FACT-Cog) to evaluate CRCI [19, 20]. While these scales are widely recognized and reliable, they lack objectivity. Therefore, in our meta-analysis, we will utilize neuroimaging results and BDNF measures for subsequent analysis, as the data permits.

The objective of this study is to conduct a comprehensive systematic review and meta-analysis of the existing evidence regarding acupuncture as a treatment for CRCI. The aim is to evaluate the potential benefits of acupuncture in treating CRCI, address ongoing debates about its effectiveness, provide definitive information for clinical practice, and enhance the quality of life for patients with CRCI.

## 2. Methods

### 2.1 Study registration

This study protocol is registered with the PROSPERO International Prospective Register of Systematic Reviews (registration number CRD42024568093). The study will strictly abide by the guidelines of the Preferred Reporting Items for Systematic Reviews and Meta-Analysis Protocols (PRISMA-P). The checklist for the PRISMA 2015 statement can be found in Supporting Information [S1 Checklist](#).

### 2.2 Inclusion criteria

The evaluation of study eligibility for inclusion will be based on the Participants-Interventions-Comparators-Outcome-Conclusion-Study Design (PICOS) criteria.

**2.2.1 Participants.** Eligible participants must be female breast cancer patients aged 18 years or older who have undergone or are currently undergoing chemotherapy and who meet the criteria for cognitive impairment (MMSE score  $\leq 23$  or MoCA score  $\leq 25$ ) at the time of enrollment. There are no restrictions on the participants' occupations or educational levels.

**2.2.2 Interventions.** The primary intervention in the experimental group is acupuncture, without specified criteria for the number of acupuncture points, duration, or intensity. Participants in the experimental group may receive acupuncture alone or in combination with a control group.

**2.2.3 Comparators.** The control group should receive conventional care or treatment, which includes sham acupuncture, pharmaceutical interventions (such as antidementia drugs, central nervous system stimulants, erythropoietin, and other herbal preparations), and non-pharmacological interventions (such as cognitive training, psychological interventions, and exercise therapy). The modalities of sham acupuncture include the following: 1. Sham acupuncture, in which needles are applied to areas that do not have a therapeutic effect; 2. Non-penetrating acupuncture, in which needles are applied using a needle set that does not penetrate the skin and resembles real needles; and 3. Superficial acupuncture, in which needles penetrate only the superficial layers of the skin and do not produce a therapeutic effect.

**2.2.4 Outcomes.** Key outcomes include assessments of cognitive function and neuroimaging changes. The assessment scales are limited to the Montreal Cognitive Assessment (MoCA), the Mini-Mental State Examination (MMSE), the Functional Assessment of Cancer Therapy-Cognitive Function (FACT-Cog), the Auditory Verbal Learning Test (AVLT), the Trail

Making Test (TMT), and the Controlled Oral Word Association Test (COWA) [19]. We will perform a neuroimaging assessment using magnetic resonance spectroscopy (MRS), focusing on changes in the metabolites N-acetylaspartate (NAA), choline (Cho), and myo-inositol (mI) [44]. Additionally, serum BDNF levels, which reflect the brain's self-repair function, will be considered an important outcome [45].

**2.2.5 Study designs.** All clinical RCTs relevant to the study topic will be included in this research, with language constraints limited to English and Chinese. Non-RCTs, observational studies, prospective studies, animal experiments, reviews, meta-analyses, and case reports will be excluded.

## 2.3 Exclusion criteria

1. patients with pre-existing neurological diseases should be excluded. 2. We will exclude non-RCTs, observational studies, prospective studies, animal experiments, reviews, meta-analyses, and case reports.

## 2.4 Search strategy

We will search seven literature databases, including PubMed, EMBASE, Web of Science, the Chinese Biomedical Literature Database, Cochrane Library, Wanfang Database, and the China National Knowledge Infrastructure (CNKI). Additionally, we will search for ongoing trials in three trial registry databases: ClinicalTrials, the EU Clinical Trials Register, and the WHO International Clinical Trials Registry Platform (ICTRP). Gray literature will be searched using Google Scholar, ProQuest, and ResearchGate. The time frame for the literature and data is from the construction of the repository to October 2024, with language limitations to English and Chinese. The search strategy for the PubMed database is shown in [Table 1](#).

## 2.5 Study selection and data extraction

Initially, we will import the collected material into Zotero software and remove duplicate studies. The screening process will be divided into two phases. In the first phase, two authors (LL

**Table 1. Search strategies for PubMed databases.**

| No. | Search terms                                                                                                                                                                                                                                                                                                                                                                                                                             |
|-----|------------------------------------------------------------------------------------------------------------------------------------------------------------------------------------------------------------------------------------------------------------------------------------------------------------------------------------------------------------------------------------------------------------------------------------------|
| #1  | "Breast Neoplasms"[MeSH] OR "Breast cancer"[Title/Abstract] OR "Breast Neoplasms"[Title/Abstract] OR "Breast Tumors"[Title/Abstract] OR "Mammary Cancer"[Title/Abstract] OR "Breast Malignant Neoplasm"[Title/Abstract] OR "Breast Carcinomas"[Title/Abstract] OR "breast malignancies"[Title/Abstract]                                                                                                                                  |
| #2  | ("Drug Therapy"[Mesh] OR "chemotherapy"[Title / Abstract] OR "chemical therapy"[Title/Abstract] OR "CHEMO"[Title/ Abstract]) AND ("Neurocognitive Disorders"[Mesh] OR "Cognition Disorders"[Mesh] OR "Cognitive Dysfunction"[Mesh])                                                                                                                                                                                                      |
| #3  | "Chemotherapy-Related Cognitive Impairment"[MeSH] OR "Chemotherapy Related Cognitive Impairment"[Title/Abstract] OR "CRCI"[Title/Abstract] OR "Chemotherapy-Related Cognitive Impairments"[Title/Abstract] OR "Chemotherapy-Related Cognitive Dysfunction"[Title/Abstract] OR "Chemotherapy Related Cognitive Dysfunction"[Title/Abstract] OR "Chemo-Fog"[Title/Abstract] OR "Chemo Fog"[Title/Abstract] OR "Chemobrain"[Title/Abstract] |
| #4  | #2 OR #3                                                                                                                                                                                                                                                                                                                                                                                                                                 |
| #5  | "Acupuncture"[MeSH] OR "Acupuncture Therapy"[MeSH] OR "Acupuncture"[Title/Abstract] OR "Acupuncture Therapy"[Title/Abstract] OR "Acupuncture Treatment"[Title/Abstract] OR "Acupotomy"[Title/Abstract] OR "Electroacupuncture"[Title/Abstract]                                                                                                                                                                                           |
| #6  | Randomized Controlled Trial[Publication Type] OR controlled clinical trial[Publication Type] OR randomized[Title/Abstract] OR randomly[Title/Abstract] OR trial[Title/Abstract] OR groups[Title/Abstract] OR placebo[Title/ Abstract]                                                                                                                                                                                                    |
| #7  | #1 AND #4 AND #5 AND #6                                                                                                                                                                                                                                                                                                                                                                                                                  |

<https://doi.org/10.1371/journal.pone.0318984.t001>

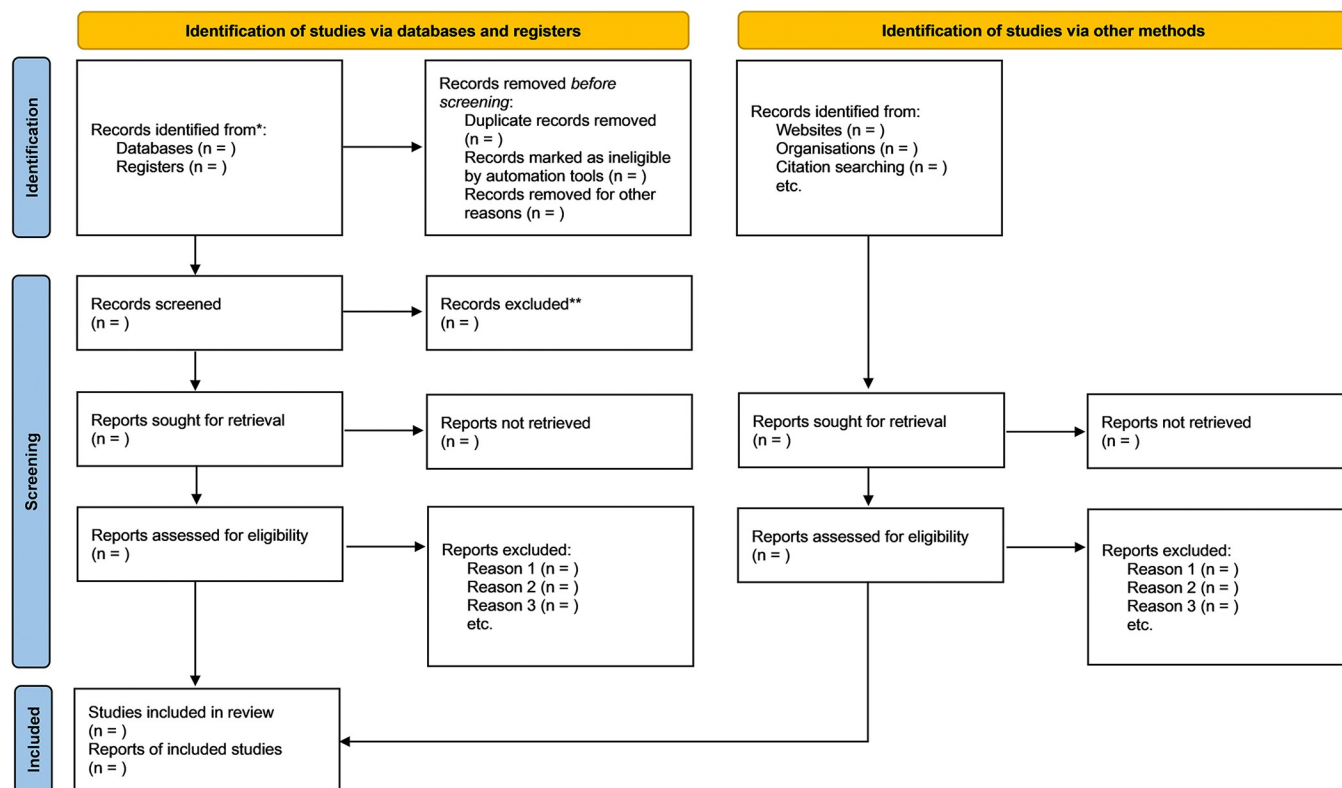

**Fig 1. Flow chart of the study screening process.**

<https://doi.org/10.1371/journal.pone.0318984.g001>

and ZM) will independently examine the titles and abstracts of all studies to identify eligible ones based on the eligibility criteria. In the second phase, both authors will read the full texts of the eligible studies to verify their accuracy. Any conflicts that arise will first be discussed and resolved, with a third author (JY) consulted if necessary. Fig 1 illustrates the study screening process. The two authors (LL and ZM) will develop a numeric data extraction form to collect information from the included studies, including authors, year of publication, study design, sample size, participant characteristics, interventions and their details in both experimental and control groups, primary outcomes, and secondary outcomes. If any studies have incomplete or missing data, the corresponding authors will be contacted by email or phone for additional information.

## 2.6 Quality assessment

The quality of the included studies will be assessed using the Cochrane Risk of Bias Tool for Randomized Trials (RoB2). This tool comprises five primary domains: bias arising from the randomization process, deviations from intended interventions, missing outcome data, outcome measurement, and selective reporting. Each domain will be categorized as “low,” “high,” or “some concerns.” The quality assessment of all included studies will be conducted independently by two authors (LL and ZM). In the event of any differences, these will be resolved through open discussion among all authors.

## 2.7 Data synthesis and analysis

Data synthesis and analysis will be conducted using RevMan 5.4 software. For continuous outcomes, data will be analyzed using the mean difference (MD) and 95% confidence interval

(CI) when the same or similar measures and units are used between studies, and using the standardized mean difference (SMD) and 95% CI when different measurement tools, scales, or units are employed. For dichotomous outcomes, data will be analyzed using the risk ratio (RR) and 95% CI when the event rate is high ( $>10\%$ ) and using the odds ratio (OR) and 95% CI when the event rate is low ( $<10\%$ ).

**2.7.1 Assessment of heterogeneity.** Heterogeneity will be evaluated using the Q statistic and the  $I^2$  statistic and will be visually represented and analyzed using forest plots. With low heterogeneity ( $P \geq 0.1$ ,  $I^2 \leq 50\%$ ), the data will be analyzed using a fixed-effects model. If heterogeneity is high ( $P < 0.1$ ,  $I^2 > 50\%$ ), data will be analyzed using a random-effects model, with meta-regression and subgroup analysis to identify the sources of heterogeneity. Narrative analysis will be performed if heterogeneity is too great for meta-analysis.

**2.7.2 Subgroup analysis.** To analyze sources of heterogeneity when it is high, or to explore correlations when it is low, we will conduct subgroup analyses when data permit. Criteria for subgroup grouping may include tumor metastasis, length of a single acupuncture session, type of acupuncture, and treatment course.

**2.7.3 Sensitivity analysis.** We will perform sensitivity analyses using a case-by-case exclusion method to assess the robustness and reliability of the combined results.

**2.7.4 Assessment of the quality of evidence.** The quality of evidence will be assessed using the Grading of Recommendations Assessment Development and Evaluation (GRADE) system. The GRADE quality assessment is categorized into five domains: risk of bias, inconsistency, indirectness, imprecision, and publication bias. The quality of evidence is classified into four grades: “high,” “moderate,” “low,” and “very low.” Two authors (LL and ZM) will independently evaluate the quality of evidence for each included study using GRADEpro GDT software, and any disputes will be resolved through discussion among all authors.

**2.7.5 Publication bias.** When more than ten studies are included, publication bias will be analyzed using the Egger test and funnel plots. When fewer than ten studies are included, publication bias will be analyzed using the Begg test and funnel plot.

## 2.8 Ethics and dissemination

This study is a systematic review and meta-analysis using published data and does not require ethical approval.

## 3. Discussion

Breast cancer patients treated with chemotherapy have a high likelihood of developing CRCI. Although this cognitive impairment is typically modest to moderate, it nonetheless significantly affects patients' treatment processes and quality of life. The efficacy of pharmaceutical therapies for CRCI is not particularly clear; they do not demonstrate advantages over nonpharmacological therapies and can have negative side effects. Therefore, nonpharmacological therapies are preferable for treating CRCI. The effectiveness of acupuncture, a traditional Chinese medicine therapy, in treating cognitive impairment is recognized in clinical practice, but its efficacy for CRCI remains debated. While prior systematic reviews and network meta-analyses have assessed acupuncture's effectiveness for CRCI, their findings are limited due to the small number of included studies, older publication dates, and reliance on subjective outcomes. More recent studies on acupuncture for CRCI have utilized rigorous research methods, more objective scales, and outcomes such as neuroimaging results and BDNF measurements. This systematic review will analyze and synthesize these studies to provide reliable results that will enhance the treatment of patients with CRCI and enable clinicians to make clearer therapeutic decisions.



## Supporting information

**S1 Checklist. PRISMA 2015 checklist.**  
(DOCX)

## Author Contributions

**Conceptualization:** Lishi Liu, Zihan Meng, Jun Yan.

**Data curation:** Lishi Liu.

**Formal analysis:** Lishi Liu, Jun Yan.

**Investigation:** Lishi Liu, Zihan Meng.

**Methodology:** Lishi Liu, Zihan Meng.

**Software:** Lishi Liu.

**Writing – original draft:** Lishi Liu.

**Writing – review & editing:** Lishi Liu, Zihan Meng, Jun Yan.

## References

1. Siegel RL, Giaquinto AN, Jemal A. Cancer statistics, 2024. *CA Cancer J Clin.* 2024; 74: 12–49. <https://doi.org/10.3322/caac.21820> PMID: 38230766
2. Bray F, Laversanne M, Sung H, Ferlay J, Siegel RL, Soerjomataram I, et al. Global cancer statistics 2022: GLOBOCAN estimates of incidence and mortality worldwide for 36 cancers in 185 countries. *CA Cancer J Clin.* 2024; 74: 229–263. <https://doi.org/10.3322/caac.21834> PMID: 38572751
3. Mutebi M, Anderson BO, Duggan C, Adebamowo C, Agarwal G, Ali Z, et al. Breast cancer treatment: A phased approach to implementation. *Cancer.* 2020; 126 Suppl 10: 2365–2378. <https://doi.org/10.1002/cncr.32910> PMID: 32348571
4. Waks AG, Winer EP. Breast Cancer Treatment: A Review. *JAMA.* 2019; 321: 288–300. <https://doi.org/10.1001/jama.2018.19323> PMID: 30667505
5. Moo T-A, Sanford R, Dang C, Morrow M. Overview of Breast Cancer Therapy. *PET Clin.* 2018; 13: 339–354. <https://doi.org/10.1016/j.cpet.2018.02.006> PMID: 30100074
6. Janelsins MC, Kesler SR, Ahles TA, Morrow GR. Prevalence, mechanisms, and management of cancer-related cognitive impairment. *Int Rev Psychiatry.* 2014 [cited 4 Sep 2024]. Available: <https://doi.org/10.3109/09540261.2013.864260> PMID: 24716504
7. Amani O, Mazaheri MA, Moghani MM, Zarani F, Choolabi RH. Chemotherapy-induced cognitive impairment in breast cancer survivors: A systematic review of studies from 2000 to 2021. *Cancer Rep.* 2024; 7: e1989. <https://doi.org/10.1002/cnr2.1989> PMID: 38351543
8. Bai L, Yu E. A narrative review of risk factors and interventions for cancer-related cognitive impairment. *Ann Transl Med.* 2021; 9: 72. <https://doi.org/10.21037/atm-20-6443> PMID: 33553365
9. Tannock IF, Ahles TA, Ganz PA, Van Dam FS. Cognitive impairment associated with chemotherapy for cancer: report of a workshop. *J Clin Oncol Off J Am Soc Clin Oncol.* 2004; 22: 2233–2239. <https://doi.org/10.1200/JCO.2004.08.094> PMID: 15169812
10. Vardy J, Wefel JS, Ahles T, Tannock IF, Schagen SB. Cancer and cancer-therapy related cognitive dysfunction: an international perspective from the Venice cognitive workshop. *Ann Oncol Off J Eur Soc Med Oncol.* 2008; 19: 623–629. <https://doi.org/10.1093/annonc/mdm500> PMID: 17974553
11. Wefel JS, Vardy J, Ahles T, Schagen SB. International Cognition and Cancer Task Force recommendations to harmonise studies of cognitive function in patients with cancer. *Lancet Oncol.* 2011; 12: 703–708. [https://doi.org/10.1016/S1470-2045\(10\)70294-1](https://doi.org/10.1016/S1470-2045(10)70294-1) PMID: 21354373
12. Zhang Q, Gao X, Liu S, Yu L, Zhu J, Qiu S. Therapies for cognitive impairment in breast cancer survivors treated with chemotherapy: A protocol for systematic review. *Medicine (Baltimore).* 2020; 99: e20092. <https://doi.org/10.1097/MD.00000000000020092> PMID: 32384481
13. Janelsins MC, Kohli S, Mohile SG, Usuki K, Ahles TA, Morrow GR. An update on cancer- and chemotherapy-related cognitive dysfunction: current status. *Semin Oncol.* 2011; 38: 431–438. <https://doi.org/10.1053/j.seminoncol.2011.03.014> PMID: 21600374

14. Koppelmans V, Breteler MMB, Boogerd W, Seynaeve C, Gundy C, Schagen SB. Neuropsychological performance in survivors of breast cancer more than 20 years after adjuvant chemotherapy. *J Clin Oncol Off J Am Soc Clin Oncol*. 2012; 30: 1080–1086. <https://doi.org/10.1200/JCO.2011.37.0189> PMID: 22370315
15. Wefel JS, Kesler SR, Noll KR, Schagen SB. Clinical characteristics, pathophysiology, and management of noncentral nervous system cancer-related cognitive impairment in adults. *CA Cancer J Clin*. 2015; 65: 123–138. <https://doi.org/10.3322/caac.21258> PMID: 25483452
16. Boykoff N, Moieni M, Subramanian SK. Confronting chemobrain: an in-depth look at survivors' reports of impact on work, social networks, and health care response. *J Cancer Surviv Res Pract*. 2009; 3: 223–232. <https://doi.org/10.1007/s11764-009-0098-x> PMID: 19760150
17. Myers JS. Chemotherapy-related cognitive impairment: the breast cancer experience. *Oncol Nurs Forum*. 2012; 39: E31–40. <https://doi.org/10.1188/12.ONF.E31-E40> PMID: 22201666
18. Bolton G, Isaacs A. Women's experiences of cancer-related cognitive impairment, its impact on daily life and care received for it following treatment for breast cancer. *Psychol Health Med*. 2018; 23: 1261–1274. <https://doi.org/10.1080/13548506.2018.1500023> PMID: 30048158
19. Lv L, Mao S, Dong H, Hu P, Dong R. Pathogenesis, Assessments, and Management of Chemotherapy-Related Cognitive Impairment (CRCI): An Updated Literature Review. *J Oncol*. 2020; 2020: 3942439. <https://doi.org/10.1155/2020/3942439> PMID: 32684930
20. Lange M, Joly F, Vardy J, Ahles T, Dubois M, Tron L, et al. Cancer-related cognitive impairment: an update on state of the art, detection, and management strategies in cancer survivors. *Ann Oncol Off J Eur Soc Med Oncol*. 2019; 30: 1925–1940. <https://doi.org/10.1093/annonc/mdz410> PMID: 31617564
21. Karschnia P, Parsons MW, Dietrich J. Pharmacologic management of cognitive impairment induced by cancer therapy. *Lancet Oncol*. 2019; 20: e92–e102. [https://doi.org/10.1016/S1470-2045\(18\)30938-0](https://doi.org/10.1016/S1470-2045(18)30938-0) PMID: 30723041
22. Miladi N, Dossa R, Dogba MJ, Cl  ophat-Jolicoeur MIF, Gagnon B. Psychostimulants for cancer-related cognitive impairment in adult cancer survivors: a systematic review and meta-analysis. *Support Care Cancer Off J Multinat   Assoc Support Care Cancer*. 2019; 27: 3717–3727. <https://doi.org/10.1007/s00520-019-04907-w> PMID: 31250183
23. Lawrence JA, Griffin L, Balcueva EP, Groteluschen DL, Samuel TA, Lesser GJ, et al. A study of donepezil in female breast cancer survivors with self-reported cognitive dysfunction 1 to 5 years following adjuvant chemotherapy. *J Cancer Surviv Res Pract*. 2016; 10: 176–184. <https://doi.org/10.1007/s11764-015-0463-x> PMID: 26130292
24. Rapp SR, Dressler EV, Brown WM, Wade JL, Le-Lindqwister N, King D, et al. Phase III Randomized, Placebo-Controlled Clinical Trial of Donepezil for Treatment of Cognitive Impairment in Breast Cancer Survivors After Adjuvant Chemotherapy (WF-97116). *J Clin Oncol Off J Am Soc Clin Oncol*. 2024; 42: 2546–2557. <https://doi.org/10.1200/JCO.23.01100> PMID: 38709986
25. Fernandes HA, Richard NM, Edelstein K. Cognitive rehabilitation for cancer-related cognitive dysfunction: a systematic review. *Support Care Cancer Off J Multinat   Assoc Support Care Cancer*. 2019; 27: 3253–3279. <https://doi.org/10.1007/s00520-019-04866-2> PMID: 31147780
26. Johns SA, Von Ah D, Brown LF, Beck-Coon K, Talib TL, Alyea JM, et al. Randomized controlled pilot trial of mindfulness-based stress reduction for breast and colorectal cancer survivors: effects on cancer-related cognitive impairment. *J Cancer Surviv Res Pract*. 2016; 10: 437–448. <https://doi.org/10.1007/s11764-015-0494-3> PMID: 26586494
27. Campbell KL, Zdravec K, Bland KA, Chesley E, Wolf F, Janelinsins MC. The Effect of Exercise on Cancer-Related Cognitive Impairment and Applications for Physical Therapy: Systematic Review of Randomized Controlled Trials. *Phys Ther*. 2020; 100: 523–542. <https://doi.org/10.1093/ptj/pzz090> PMID: 32065236
28. Chan RJ, McCarthy AL, Devenish J, Sullivan KA, Chan A. Systematic review of pharmacologic and non-pharmacologic interventions to manage cognitive alterations after chemotherapy for breast cancer. *Eur J Cancer Oxf Engl* 1990. 2015; 51: 437–450. <https://doi.org/10.1016/j.ejca.2014.12.017> PMID: 25623439
29. Lin J-G, Kotha P, Chen Y-H. Understandings of acupuncture application and mechanisms. *Am J Transl Res*. 2022; 14: 1469–1481. PMID: 35422904
30. Kelly RB, Willis J. Acupuncture for Pain. *Am Fam Physician*. 2019; 100: 89–96. PMID: 31305037
31. Cheuk DKL, Yeung W-F, Chung KF, Wong V. Acupuncture for insomnia. *Cochrane Database Syst Rev*. 2012; 2012: CD005472. <https://doi.org/10.1002/14651858.CD005472.pub3> PMID: 22972087
32. Errington-Evans N. Acupuncture for anxiety. *CNS Neurosci Ther*. 2012; 18: 277–284. <https://doi.org/10.1111/j.1755-5949.2011.00254.x> PMID: 22070429



33. Smith CA, Armour M, Lee MS, Wang L-Q, Hay PJ. Acupuncture for depression. *Cochrane Database Syst Rev*. 2018; 3: CD004046. <https://doi.org/10.1002/14651858.CD004046.pub4> PMID: 29502347
34. Liu Y, Liu J-E, Chen S, Zhao F, Chen L, Li R. Effectiveness of Nonpharmacologic Interventions for Chemotherapy-Related Cognitive Impairment in Breast Cancer Patients: A Systematic Review and Network Meta-analysis. *Cancer Nurs*. 2023; 46: E305. <https://doi.org/10.1097/NCC.0000000000001152> PMID: 37607381
35. Zhang Z-J, Man S-C, Yam L-L, Yiu CY, Leung RC-Y, Qin Z-S, et al. Electroacupuncture trigeminal nerve stimulation plus body acupuncture for chemotherapy-induced cognitive impairment in breast cancer patients: An assessor-participant blinded, randomized controlled trial. *Brain Behav Immun*. 2020; 88: 88–96. <https://doi.org/10.1016/j.bbi.2020.04.035> PMID: 32305573
36. Wu Z, Liu N, Zhang Y, Liang T, Luo X, Zhang Q. Brain Mechanisms of Chemotherapy-Related Cognitive Impairment in Breast Cancer Treated with Acupuncture: Based on Resting-State Functional Magnetic Resonance Imaging. *J Tradit Chin Med*. 2024; 65: 495–502. <https://doi.org/10.13288/j.11-2166/r.2024.05.010>
37. Zhang Y, Zhang C, Xu X, Zhang Q. Clinical Observation on Acupuncture of Reconciling Qi and Blood, Tonifying Heart and Mind Method in the Treatment of 53 Patients of Breast Cancer Chemotherapy-related Cognitive Impairment with Disorder of Qi and Blood Syndrome. *J Tradit Chin Med*. 2019; 60: 509–513. <https://doi.org/10.13288/j.11-2166/r.2019.06.013>
38. Zhang C, Han D, Zhang Y, Li N, Zhang Q. Clinical Study on Acupuncture Treatment of Yiqi-Tiaoshen Acupoint on Mild Cognitive Impairment Caused by Chemotherapy of Breast Cancer Patients. *Guid J Tradit Chin Med Pharm*. 2018; 24: 49–52. <https://doi.org/10.13862/j.cnki.cn43-1446/r.2018.09.014>
39. Tong T, Pei C, Chen J, Lv Q, Zhang F, Cheng Z. Efficacy of Acupuncture Therapy for Chemotherapy-Related Cognitive Impairment in Breast Cancer Patients. *Med Sci Monit Int Med J Exp Clin Res*. 2018; 24: 2919–2927. <https://doi.org/10.12659/MSM.909712> PMID: 29735975
40. Soligo M, Nori SL, Protto V, Florenzano F, Manni L. Acupuncture and neurotrophin modulation. *Int Rev Neurobiol*. 2013; 111: 91–124. <https://doi.org/10.1016/B978-0-12-411545-3.00005-5> PMID: 24215919
41. Liou KT, Garland SN, Li QS, Sadeghi K, Green J, Autuori I, et al. Effects of acupuncture versus cognitive behavioral therapy on brain-derived neurotrophic factor in cancer survivors with insomnia: an exploratory analysis. *Acupunct Med J Br Med Acupunct Soc*. 2021; 39: 637–645. <https://doi.org/10.1177/0964528421999395> PMID: 33752446
42. Manni L, Rocco ML, Barbaro Paparo S, Guaragna M. Electroacupuncture and nerve growth factor: potential clinical applications. *Arch Ital Biol*. 2011; 149: 247–255. <https://doi.org/10.4449/aib.v149i2.1365> PMID: 21701996
43. Zhao S, Zhang J, Wan H, Tao C, Hu M, Liang W, et al. Role of Chinese Acupuncture in the Treatment for Chemotherapy-Induced Cognitive Impairment in Older Patients With Cancer: Protocol for a Randomized Controlled Trial. *JMIR Res Protoc*. 2024; 13: e53853. <https://doi.org/10.2196/53853> PMID: 38329790
44. Yao S, Zhang Q, Yao X, Zhang X, Pang L, Yu S, et al. Advances of neuroimaging in chemotherapy related cognitive impairment (CRCI) of patients with breast cancer. *Breast Cancer Res Treat*. 2023; 201: 15–26. <https://doi.org/10.1007/s10549-023-07005-y> PMID: 37329458
45. Manni L, Albanesi M, Guaragna M, Barbaro Paparo S, Aloe L. Neurotrophins and acupuncture. *Auton Neurosci Basic Clin*. 2010; 157: 9–17. <https://doi.org/10.1016/j.autneu.2010.03.020> PMID: 20451467
